# Supplementary material
Source: publisher figshare collection journal article supplement (https://frontiersin.figshare.com/ndownloader/files/25800890)
Supplement: Supplementary file [file 25800890]

**Table S1. Target and foil words used in the experiment**

| Noisy sentences + foil words |             |            |                           |            |             | Noisy sentences             |                                               |
|------------------------------|-------------|------------|---------------------------|------------|-------------|-----------------------------|-----------------------------------------------|
|                              | Target word |            |                           | Foil word  |             |                             | Target word                                   |
| 1                            | ping1<br>乒  | pang1<br>乓 | qiu2<br>球<br>table tennis | yu3<br>羽   | mao2<br>毛   | qiu2<br>球<br>badminton      | 21<br>jue2<br>决<br>sai4<br>赛<br>final         |
| 2                            | yan1<br>烟   | hui1<br>灰  | gang1<br>缸<br>ashtray     | la1<br>垃   | ji1<br>圾    | tong3<br>桶<br>trash can     | 22<br>shou1<br>收<br>yin1<br>音<br>radio        |
| 3                            | qi4<br>汽    | che1<br>车  | zhan4<br>站<br>bus stop    | huo3<br>火  | che1<br>车   | zhan4<br>站<br>train station | 23<br>wo3<br>我<br>men1<br>们<br>we             |
| 4                            | gong1<br>工  | zuo4<br>作  | work                      | xue2<br>学  | xi2<br>习    | study                       | 24<br>fei1<br>飞<br>die2<br>碟<br>flying saucer |
| 5                            | san4<br>散   | bu4<br>步   | a walk                    | pao3<br>跑  | bu4<br>步    | a run                       | 25<br>zhi1<br>支<br>piece                      |
| 6                            | ba4<br>爸    | ba0<br>爸   | Dad                       | ye3<br>爷   | ye0<br>爷    | Grandpa                     | 26<br>chun1<br>春<br>tian1<br>天<br>spring      |
| 7                            | jin1<br>今   | tian1<br>天 | today                     | zuo2<br>昨  | tian1<br>天  | yesterday                   | 27<br>na3<br>哪<br>ge4<br>个<br>which           |
| 8                            | zhuo1<br>桌  | zi0<br>子   | table                     | yi3<br>椅   | zi0<br>子    | chair                       | 28<br>qian2<br>钱<br>money                     |
| 9                            | xiao3<br>小  | hai2<br>孩  | child                     | xiao3<br>小 | gou3<br>狗   | puppy                       | 29<br>men2<br>门<br>kou3<br>口<br>door          |
| 10                           | na4<br>那    | ge0<br>个   | that                      | zhe4<br>这  | ge0<br>个    | this                        | 30<br>jin1<br>今<br>nian2<br>年<br>this year    |
| 11                           | zuo4<br>作   | wen2<br>文  | composition               | shu1<br>书  | fa3<br>法    | calligraphy                 | 31<br>liu2<br>流<br>gan3<br>感<br>flu           |
| 12                           | tong2<br>同  | xue2<br>学  | classmates                | peng2<br>朋 | you3<br>友   | friends                     | 32<br>jie3<br>姐<br>fu1<br>夫<br>brother-in-law |
| 13                           | xia4<br>下   | wu3<br>午   | afternoon                 | wan3<br>晚  | shang4<br>上 | evening                     | 33<br>peng2<br>朋<br>you3<br>友<br>kid          |
| 14                           | jia4<br>驾   | shi3<br>驶  | driving                   | lv4<br>律   | shi1<br>师   | lawyer's                    | 34<br>guo2<br>国<br>wai4<br>外<br>abroad        |

| Clear sentences + foil words |                                          |                                               | Clear sentences |                                               |
|------------------------------|------------------------------------------|-----------------------------------------------|-----------------|-----------------------------------------------|
|                              | Target word                              | Foil word                                     |                 | Target word                                   |
| 15                           | su4      she4<br>宿      舍<br>dormitories | jiao4      shi4<br>教      室<br>classrooms     | 35              | shou3      zhi3<br>手      指<br>finger         |
| 16                           | xia4      ban1<br>下      班<br>off work   | shang4      ban1<br>上      班<br>going to work | 36              | xian4      cheng2<br>县      城<br>country seat |
| 17                           | xiao3      mao1<br>小      猫<br>kitten    | xiao3      gou3<br>小      狗<br>puppy          | 37              | jiang3      hua3<br>讲      话<br>spoke         |
| 18                           | zhe4      ge0<br>这      个<br>this        | na4      ge0<br>那      个<br>that              | 38              | ba4      ba0<br>爸      爸<br>Dad               |
| 19                           | fa2      wei4<br>乏      味<br>boring      | wu2      qu4<br>无      趣<br>uninteresting     | 39              | jian4      zhu4<br>建      筑<br>construction   |
| 20                           | pai2      zi0<br>牌      子<br>brand       | xing2      hao4<br>型      号<br>model          | 40              | nv3      hai2<br>女      孩<br>girl             |
